# Supplementary figures and images for: Physical, Chemical, and Sensory Characteristics in Yellow Caturra Coffee: A Comparison Between Fermenters
Source: Research Square preprint supplement (doi:10.21203/rs.3.rs-6968781/v1), 2025-07-01

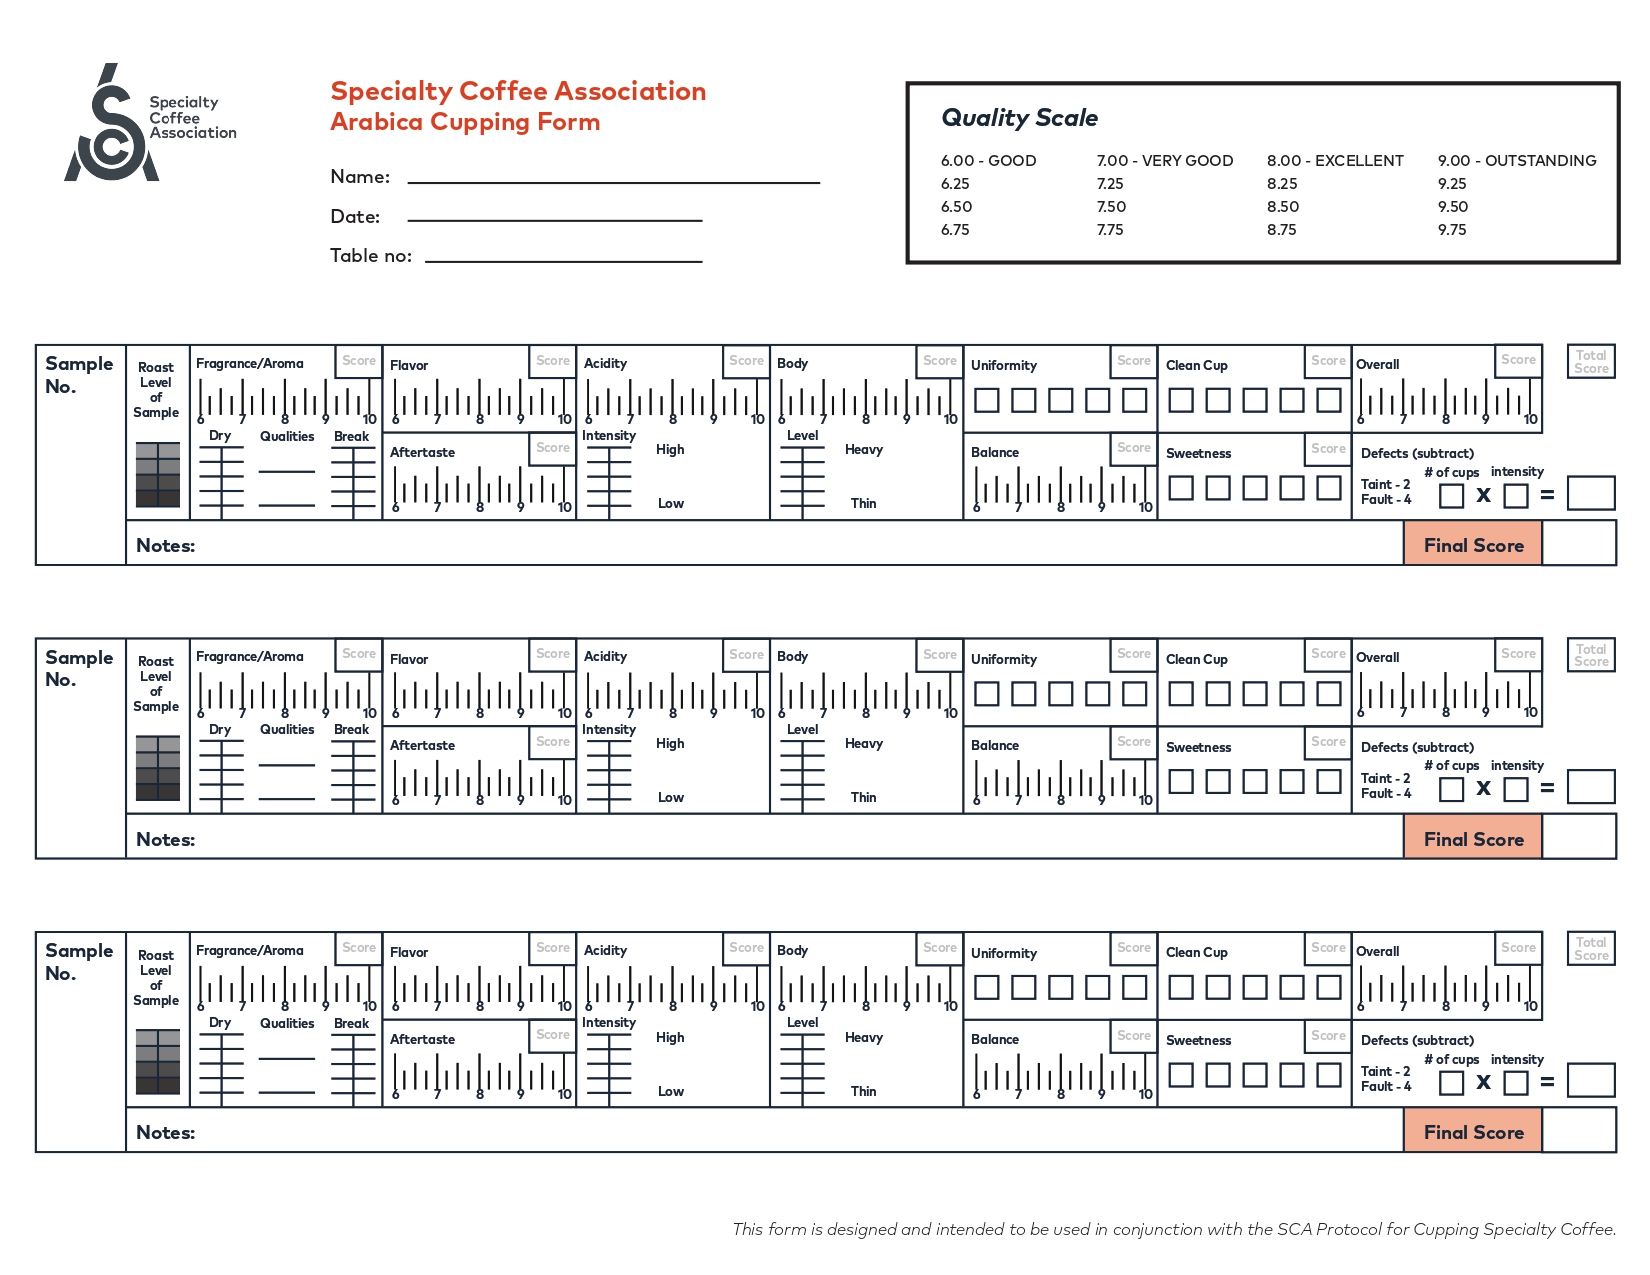

Supplement: Supplementary file 1 [file 453f0eb5ef6bf37b3660485a.docx]
